# Supplementary material for: s valence electrons in cations of metal oxides serving as descriptors for electron and hole polarons
Source: Royal Society of Chemistry journal article supplement (doi:10.1039/d4cp00195h), 2024-01-01
Supplement: d4cp00195h2.pdf [file d4cp00195h2.pdf]

## Supporting information

### **s valence electrons in cations of metal oxides serving as descriptors for electron and hole polarons**

Junyan Tao, and Taifeng Liu\*

National & Local Joint Engineering Research Center for Applied Technology of Hybrid Nanomaterials, Henan University, Kaifeng, 475004, China.

*E-mail: T. Liu: tfliu@vip.henu.edu.cn*

For each material, we use supercell approach to calculate the polaron formation. As the lattice parameters are different, the details of the supercell are different. Here, we explain the calculation parameters required for each material individually.

We selected rutile  $\text{TiO}_2$  with space group  $I4_1/amd$  and  $\text{V}_2\text{O}_5$  with space group  $pmmn$  for  $2 \times 2 \times 1$  and  $3 \times 3 \times 3$  cell expansion respectively.  $\text{TiO}_2$  supercell parameters are  $a = 10.62 \text{ \AA}$ ,  $b = 11.17 \text{ \AA}$ ,  $c = 9.40 \text{ \AA}$ ,  $\alpha = \beta = \gamma = 90^\circ$ ,  $\text{V}_2\text{O}_5$  supercell parameters are  $a = 10.90 \text{ \AA}$ ,  $b = 14.26 \text{ \AA}$ ,  $c = 11.55 \text{ \AA}$ ,  $\alpha = \beta = \gamma = 90^\circ$ . We used supercells for subsequent calculations.

We used  $\text{SrTiO}_3$  unit cell with space group  $P42/nmc$  for structural optimization, where  $a = b = c = 3.945 \text{ \AA}$ ,  $\alpha = \beta = \gamma = 90^\circ$ . After the optimization is completed, we carry out  $3 \times 3 \times 3$  cell expansion, use supercell for electron polaron formation research.

We used  $\text{ZrO}_2$  unit cell with space group  $P4_2/nmc$  for calculation, where  $a = 3.64 \text{ \AA}$ ,  $b = 3.64 \text{ \AA}$ ,  $c = 5.32 \text{ \AA}$ ,  $\alpha = \beta = \gamma = 90^\circ$ . For the polarons calculations, we used a  $3 \times 3 \times 2$  supercell with 108 atoms. For  $\text{MoO}_3$ , we used primitive unit cells with  $a = 3.76 \text{ \AA}$ ,  $b = 3.96 \text{ \AA}$ ,  $c = 14.43 \text{ \AA}$ ,  $\alpha = \beta = \gamma = 90^\circ$  for  $3 \times 3 \times 1$  cell expansion.

We selected  $\text{HfO}_2$  primitive unit cells with  $a = b = 4.86 \text{ \AA}$ ,  $c = 3.23 \text{ \AA}$ ,  $\alpha = \gamma = \beta = 90^\circ$  for  $2 \times 2 \times 2$  cell expansion. For  $\text{Ta}_2\text{O}_5$  and  $\text{NaTaO}_3$  we selected primitive unit cells with  $a = 12.89 \text{ \AA}$ ,  $b = 4.87 \text{ \AA}$ ,  $c = 5.54 \text{ \AA}$ ,  $\alpha = \gamma = 90^\circ$ ,  $\beta = 104.3^\circ$  and  $a = 5.53 \text{ \AA}$ ,  $b = 5.59 \text{ \AA}$ ,  $c = 7.87 \text{ \AA}$ ,  $\alpha = \gamma = \beta = 90^\circ$  for  $1 \times 2 \times 2$  and  $2 \times 2 \times 2$  cell expansion and used the supercell containing

122 and 160 atoms for calculation.
